# Supplementary material
Source: MDPI journal article supplement (https://www.mdpi.com/2218-0532/90/3/52)
Supplement: s1 [file s1]

Archive with 1 entries (1 files):
- scipharm-1871767-supplementary.pdf
